# Supplementary material
Source: publisher site journal article supplement (http://www.spandidos-publications.com/2621/downloadSupplementary)

Figure S1. Transfection of MDA-MB-453 and MDA-MB-231 cell with vector or GCS plasmids. Quantitative PCR was used to detect the expression GCS and CYP1A1 mRNA. \*P<0.05. CYP1A1, cytochrome P450 family 1 subfamily A1; GCS, glucosylceramide synthase.

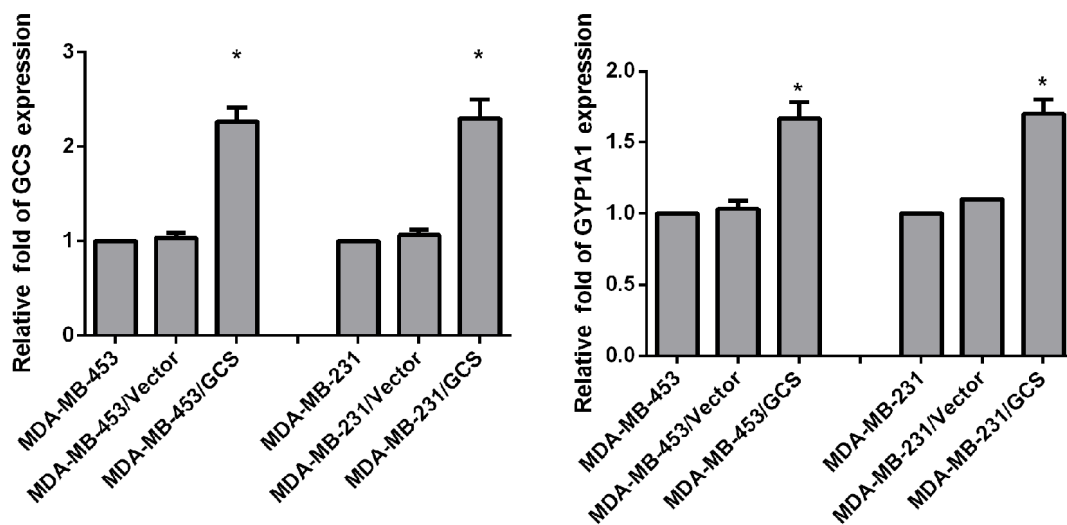

Supplement: Supplementary file 1 [file downloadSupplementary]
